# Supplementary material for: Universal Sequence Replication, Reversible Polymerization and Early Functional Biopolymers: A Model for the Initiation of Prebiotic Sequence Evolution
Source: PLOS journal article supplement (doi:10.1371/journal.pone.0034166), 2012-04-06
Supplement: S10 (10.1371/journal.pone.0034166.s010) [file journal.pone.0034166.s010]

| Parameter | Description                                                                                                            | Simulation Value(s)                                                           |
|-----------|------------------------------------------------------------------------------------------------------------------------|-------------------------------------------------------------------------------|
| $N$       | Lattice size – the simulation surface is defined as an $N \times N$ grid                                               | 64                                                                            |
| $dx$      | Spatial discretization for calculating deterministic monomer diffusion                                                 | 0.2                                                                           |
| $dt$      | Time-step for calculating deterministic monomer diffusion                                                              | 0.01                                                                          |
| $M_N$     | Initial number of <i>each</i> monomer species on each lattice site at the start of a simulation run                    | 60                                                                            |
| $M_{nf}$  | Total simulation mass (in monomeric units) for nonfunctional simulations                                               | $4.9042 \times 10^5$                                                          |
| $M_f$     | Total simulation mass (in monomeric units) for functional simulations                                                  | $7.3728 \times 10^5$ , $9.8304 \times 10^5$                                   |
| $t_h$     | Length of the hydrated phase (in units of dimensionless time)                                                          | 1.0                                                                           |
| $t_d$     | Length of the dehydrated phase (in units of dimensionless time)                                                        | 1.0                                                                           |
| $N_L$     | Length of polymers (this fixed length is meant to approximate the mean of a distribution of polymer lengths)           | 20                                                                            |
| $k_s$     | Rate constant for spontaneous assembly of random sequence polymers from monomer during the dehydrated phase            | $10^{-7}$                                                                     |
| $k_r$     | Rate constant for template-directed sequence-independent replication during the dehydrated phase                       | 0, $10^{-5}$ , $10^{-4}$ , $10^{-5}$                                          |
| $k_h$     | Rate constant for spontaneous polymer degradation during the hydrated phase                                            | $10^{-5}$ , $10^{-4}$ , $10^{-3}$ , 0.01, 0.1, 0.5, 1.0                       |
| $k_m$     | Hopping rate of monomers between lattice sites during the hydrated phase                                               | 0, 0.001, 0.005, 0.01, 0.05, 0.1, 0.5, 1.0, 5.0, 10.0, 30.0, 50.0, 70.0, 90.0 |
| $k_p$     | Hopping rate of polymers between lattice sites during the hydrated phase                                               | 0, 0.001, 0.01, 0.1, 1.0                                                      |
| $k_c$     | Rate constant for catalyzed monomer synthesis in the presence of a functional polymer with monomer synthetase activity | 100                                                                           |
